# Supplementary material for: Efficiency enhancement by defect engineering in perovskite photovoltaic cells prepared using evaporated PbI2/CH3NH3I multilayers
Source: Royal Society of Chemistry journal article supplement (doi:10.1039/c4ta05070c), 2015-01-01
Supplement: c4ta05070c1.pdf [file c4ta05070c1.pdf]

[Supporting information]

## **Efficiency enhancement by defect engineering in perovskite photovoltaic cells prepared by evaporated $\text{PbI}_2/\text{CH}_3\text{NH}_3\text{I}$ multilayers**

Annie Ng,<sup>a</sup> Zhiwei Ren,<sup>a</sup> Qian Shen,<sup>a</sup> Sin Hang Cheung,<sup>b</sup> Huseyin Cem Gokkaya,<sup>a</sup> Gongxun Bai,<sup>c</sup> Jingchuan Wang,<sup>d</sup> Lijun Yang,<sup>d</sup> Shu Kong So,<sup>b</sup> Aleksandra B. Djurišić,<sup>e</sup> Wallace Woon-fong Leung,<sup>d</sup> Jianhua Hao,<sup>c</sup> Wai Kin Chan<sup>f</sup> and Charles Surya<sup>a,\*</sup>

<sup>a</sup>Department of Electronic and Information Engineering, The Hong Kong Polytechnic University, Hong Kong SAR

<sup>b</sup>Department of Physics, Hong Kong Baptist University, Hong Kong SAR

<sup>c</sup>Department of Applied Physics, The Hong Kong Polytechnic University, Hong Kong SAR

<sup>d</sup>Department of Mechanical Engineering, The Hong Kong Polytechnic University, Hong Kong SAR

<sup>e</sup>Department of Physics, The University of Hong Kong, Pokfulam, Hong Kong SAR

<sup>f</sup>Department of Chemistry, The University of Hong Kong, Pokfulam, Hong Kong SAR

Correspondence and requests for materials should be addressed to Prof. C. Surya

([charles.surya@polyu.edu.hk](mailto:charles.surya@polyu.edu.hk))

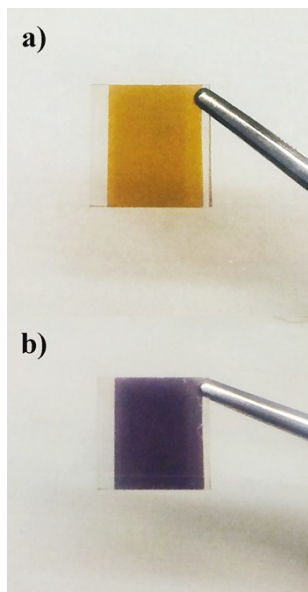

**Figure S1.** The photograph shows the change of color (a) before and (b) after thermal annealing of the thermally evaporated sample.

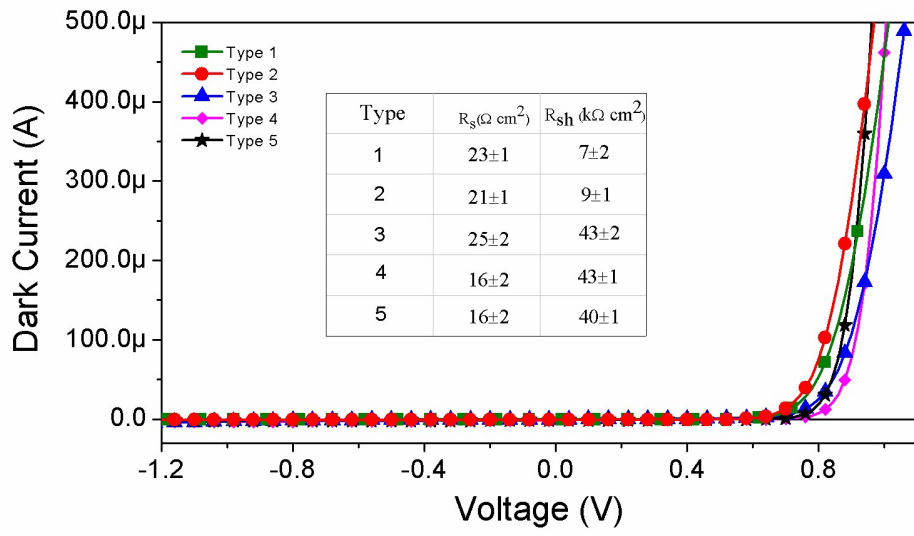

**Figure S2.** The  $I$ - $V$  characteristics of different types of devices measured in the dark.
